# Supplementary material
Source: publisher site journal article supplement (https://www.dovepress.com/article/232392)
Supplement: Supplementary file 1 [file get_supplementary_file.php]

**Appendix**

Here we discuss the effect of signal-to-noise ratio on parameter extraction in mapping, following an approach used for mapping in [45]. One begins with mono-exponential relaxation, and assume that preprocessing leads to a set of magnitude images at regularly spaced echo times where . Ideally, data will decay exponentially, with the peak amplitude depending on the magnetization and receiver sensitivity. However, real data will be corrupted by noise, so that the value at the echo time can be written as:

(A1)

The terms are derived from Gaussian noise with standard deviation **, but become Rician after conversion to magnitude [43]. However, at high the distribution again approximates to a Gaussian. It can be assumed that these conditions hold for all . If is small, this assumption requires a high at . To extract parameters, one can compare Eqn. A1 with a mono-exponential model:

(A2)

Here and are estimates of and . At high , we assume that and are close to the actual values, so they can be written as and where and are small. Retention of first order terms gives:

(A3)

Here, and . Now, the sum of the squares of the error is , or:

(A4)

The maximum likelihood estimate (MLE) is obtained when . Introducing the notation , the separate equations reduce to:

(A5)

Equations A5 are easily soluble by elimination to obtain:

(A6)

Since the terms are uncorrelated, the expected value of (the normalized error in ) may be found as:

(A7)

Here is the expected value of . Since tends to zero as rises, must also tend to zero, so the mean of is unbiased at high signal-to-noise ratio.

The standard deviation of can also be obtained in terms of the standard deviation of the noise. Since the is , where , the result can be written in terms of the standard deviation of and the as:

with

(A8)

The function is simple to compute. For example, the lines in Fig A1 show the theoretical variation of with , for values of between 3 and 9. When is low, the curves are similar; however, larger is needed to reduce as rises. For , is almost constant over a wide range, and has the approximate value 1.5. The signal-to-noise ratio needed for a given spread in values may then be estimated as . For example, a of 60 is required at to achieve a standard deviation . To verify equipment operation, we have estimated from the product of and in experiments with multi-tube phantoms, using a body coil for excitation and signal detection. The discrete points in Fig A1 show results obtained at different slice thickness and hence different ; the data do indeed lie on the theoretical curve for .

Tissue is not homogeneous. Assuming a distribution of values with standard deviation due to heterogeneity, one would expect from the law of independent variables the overall standard deviation to be given by:

(A9)

Improvements obtained by increasing will therefore limit when .

Analysis of the type above may be extended to the matching of a bi-exponential model to a bi-exponential process with signal amplitudes and and time constants and . Assuming estimates and for each process, one obtains four simultaneous equations analogous to A5:

(A10)

Here, , , and . These equations may again be solved to find the normalized errors in each time constant. However, they become ill conditioned as and approach each other, when they tend to two degenerate pairs. As many authors have shown [47, 48], bi-exponential fitting requires much higher than mono-exponential fitting when time constants are similar. Despite this, the results are again unbiased, and the separate deviations inversely proportional to .

**Figures**

1. Lines show theoretical variations of the function G that represents the link between the normalised standard deviation of T2 and the SNR with the normalised value of T2. Points show experimental values obtained using a body coil and multi-tube phantoms, for and the different slice thickness and signal-to-noise values shown.


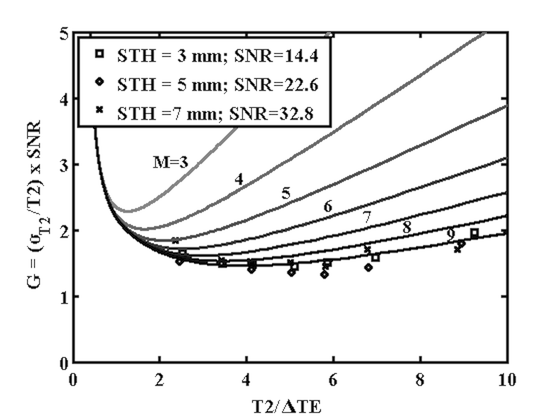


Figure A1.
